# Supplementary material for: Asymmetric dinuclear, hexanuclear and octanuclear oxovanadium citrates with triazolates: novel mixed-ligands and mixed-valence complexes
Source: Royal Society of Chemistry journal article supplement (doi:10.1039/d3dt03445c), 2023-11-20
Supplement: d3dt03445c1.pdf [file d3dt03445c1.pdf]

## Supporting information

### Asymmetric dinuclear, hexanuclear and octanuclear oxovanadium citrates with triazolates: Novel mixed-ligands and mixed-valence complexes

Zhen-Lang Xie, Zhao-Hui Zhou\*

State Key Laboratory of Physical Chemistry of Solid Surfaces and Department of Chemistry,  
College of Chemistry and Chemical Engineering, Xiamen University,  
Xiamen, 361005, China, Tel: + 86-592-2184531; Fax: + 86-592-2183047  
zhzhou@xmu.edu.cn

#### Figures and Table Options

|                                                                                                                                                                                                                                                                                                                                                                                                                                                                                                                                                                                                                                                                                                                                                                                                                                |    |
|--------------------------------------------------------------------------------------------------------------------------------------------------------------------------------------------------------------------------------------------------------------------------------------------------------------------------------------------------------------------------------------------------------------------------------------------------------------------------------------------------------------------------------------------------------------------------------------------------------------------------------------------------------------------------------------------------------------------------------------------------------------------------------------------------------------------------------|----|
| Figure S1. Scheme for some common mononuclear (a and b) and binuclear (c – h) vanadium citrates recorded in the Cambridge Structural Database (CSD, version 5.44, September 2023).<br>.....                                                                                                                                                                                                                                                                                                                                                                                                                                                                                                                                                                                                                                    | 3  |
| Figure S2. (a – e) ORTEP diagrams of <b>1</b> – <b>5</b> with thermal ellipsoids drawn at 30% probabilities level. Symmetric code: $a = 2 - x, 3 - y, -z$ . .....                                                                                                                                                                                                                                                                                                                                                                                                                                                                                                                                                                                                                                                              | 4  |
| Figure S3. (a) Representation of the coordination environments for V ions in <b>3</b> . The intramolecular (b) and intermolecular (c and d) hydrogen bonding networks in <b>3</b> . Symmetric code: $a(1 - x, 1 - y, 1 - z)$ . .....                                                                                                                                                                                                                                                                                                                                                                                                                                                                                                                                                                                           | 5  |
| Figure S4. FT-IR spectra of <b>1</b> – <b>5</b> using KBr pellets in the 4000–500 $\text{cm}^{-1}$ region. ....                                                                                                                                                                                                                                                                                                                                                                                                                                                                                                                                                                                                                                                                                                                | 6  |
| Figure S5. (a – e) TGA curves of <b>1</b> – <b>5</b> in $\text{N}_2$ stream at a heating rate of 10 $^\circ\text{C min}^{-1}$ , respectively. ....                                                                                                                                                                                                                                                                                                                                                                                                                                                                                                                                                                                                                                                                             | 7  |
| Figure S6. PXRD patterns of as-synthesized and simulated samples <b>1</b> – <b>5</b> from 5 $^\circ$ to 50 $^\circ$ with a scanning speed of 10 $^\circ$ /min, respectively. ....                                                                                                                                                                                                                                                                                                                                                                                                                                                                                                                                                                                                                                              | 8  |
| Figure S7. $\text{N}_2$ adsorption-desorption isotherms of <b>1</b> at 77 K. ....                                                                                                                                                                                                                                                                                                                                                                                                                                                                                                                                                                                                                                                                                                                                              | 9  |
| Table S1. Crystallographic data and structural refinement details for $[\text{V}_2\text{O}_2(\text{cit})(\text{Hdatrz})_3] \cdot 5\text{H}_2\text{O}$ ( <b>1</b> ), $[\text{V}_2\text{O}_2(\text{cit})(\text{Hdatrz})_3][\text{V}_2\text{O}_2(\text{cit})_2]_{1/2} \cdot 2\text{H}_2\text{datrz} \cdot 9.5\text{H}_2\text{O}$ ( <b>2</b> ), $\text{V}_6\text{O}_6(\mu_3\text{-O})_2(\text{cit})_2(\text{Hdatrz})_4 \cdot 4\text{H}_2\text{O}$ ( <b>3</b> ), $[\text{V}_3\text{O}_6(\mu_2\text{-OH})(\mu_3\text{-O})(\text{Hdatrz})_2] \cdot 4.5\text{H}_2\text{O}$ ( <b>4</b> ) and $\text{K}_2\{[\text{V}^{\text{IV/V}}_2\text{O}_2(\text{cit})(\text{Hdatrz})(\text{datrz})]_2[\text{V}^{\text{IV}}_2\text{O}_2(\text{cit})(\text{Hdatrz})(\text{datrz})]_2\} \cdot 27.5\text{H}_2\text{O}$ ( <b>5</b> ), respectively. .... | 10 |
| Table S2. Selected bond distances (Å) and angles ( $^\circ$ ) for $[\text{V}_2\text{O}_2(\text{cit})(\text{Hdatrz})_3] \cdot 5\text{H}_2\text{O}$ ( <b>1</b> ), $[\text{V}_2\text{O}_2(\text{cit})(\text{Hdatrz})_3][\text{V}_2\text{O}_2(\text{cit})_2]_{1/2} \cdot 2\text{H}_2\text{datrz} \cdot 9.5\text{H}_2\text{O}$ ( <b>2</b> ), $\text{V}_6\text{O}_6(\mu_3\text{-O})_2(\text{cit})_2(\text{Hdatrz})_4 \cdot 4\text{H}_2\text{O}$ ( <b>3</b> ), $[\text{V}_3\text{O}_6(\mu_2\text{-OH})(\mu_3\text{-O})(\text{Hdatrz})_2] \cdot 4.5\text{H}_2\text{O}$ ( <b>4</b> ) and                                                                                                                                                                                                                                                |    |

$K_2\{[V^{IV/V}O_2(cit)(Hdatrz)(datrz)]_2[V^{IV}O_2(cit)(Hdatrz)(datrz)]_2\} \cdot 27.5H_2O$  (**5**), respectively.  
..... 12

Table S3. Hydrogen bonds observed in  $[V_2O_2(cit)(Hdatrz)_3] \cdot 5H_2O$  (**1**),  
 $[V_2O_2(cit)(Hdatrz)_3][V_2O_2(cit)_2]_{1/2} \cdot 2H_2datrz \cdot 9.5H_2O$  (**2**),  $V_6O_6(\mu_3-O)_2(cit)_2(Hdatrz)_4 \cdot 4H_2O$   
(**3**),  $[V_3O_6(\mu_2-OH)(\mu_3-O)(Hdatrz)_2] \cdot 4.5H_2O$  (**4**) and  
 $K_2\{[V^{IV/V}O_2(cit)(Hdatrz)(datrz)]_2[V^{IV}O_2(cit)(Hdatrz)(datrz)]_2\} \cdot 27.5H_2O$  (**5**), respectively.  
..... 17

Table S4. Bond valence sum calculations for **1–5**, respectively. .... 20

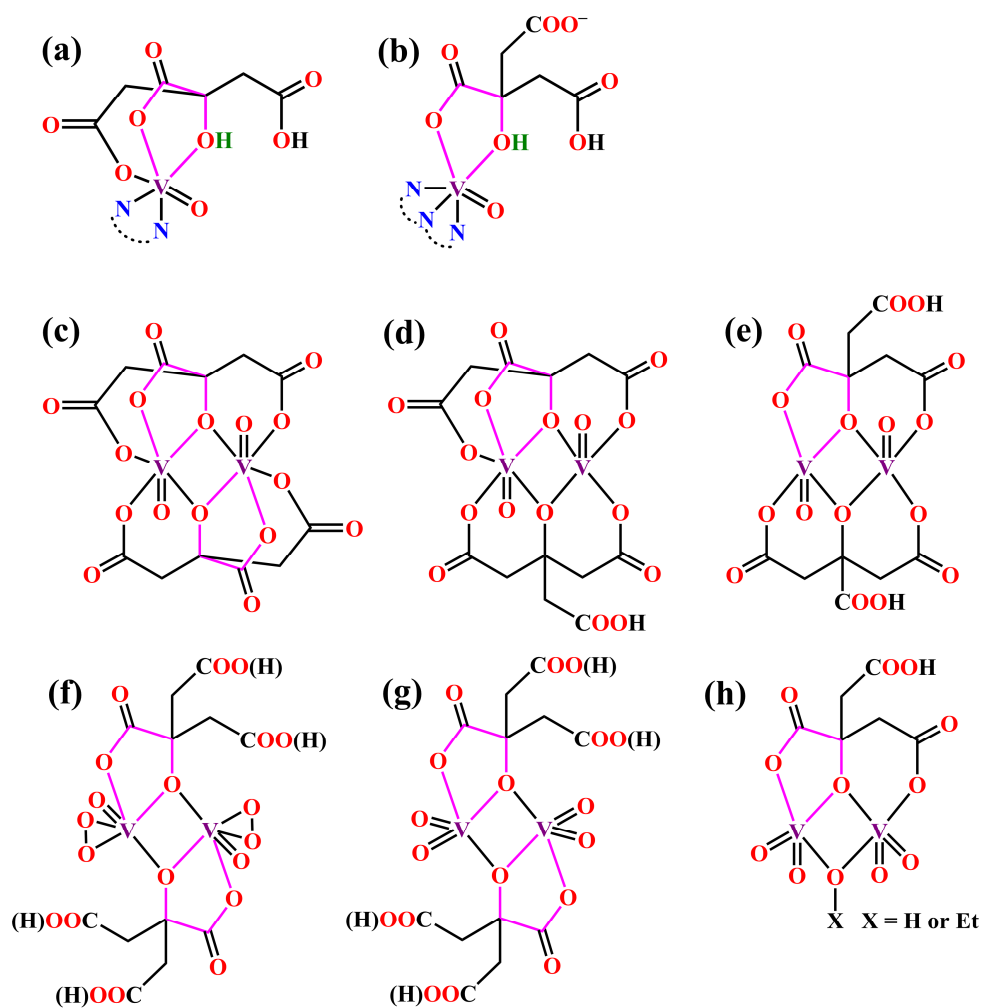

Figure S1. Scheme for some common mononuclear (a and b) and binuclear (c – h) vanadium citrates recorded in the Cambridge Structural Database (CSD, version 5.44, September 2023).

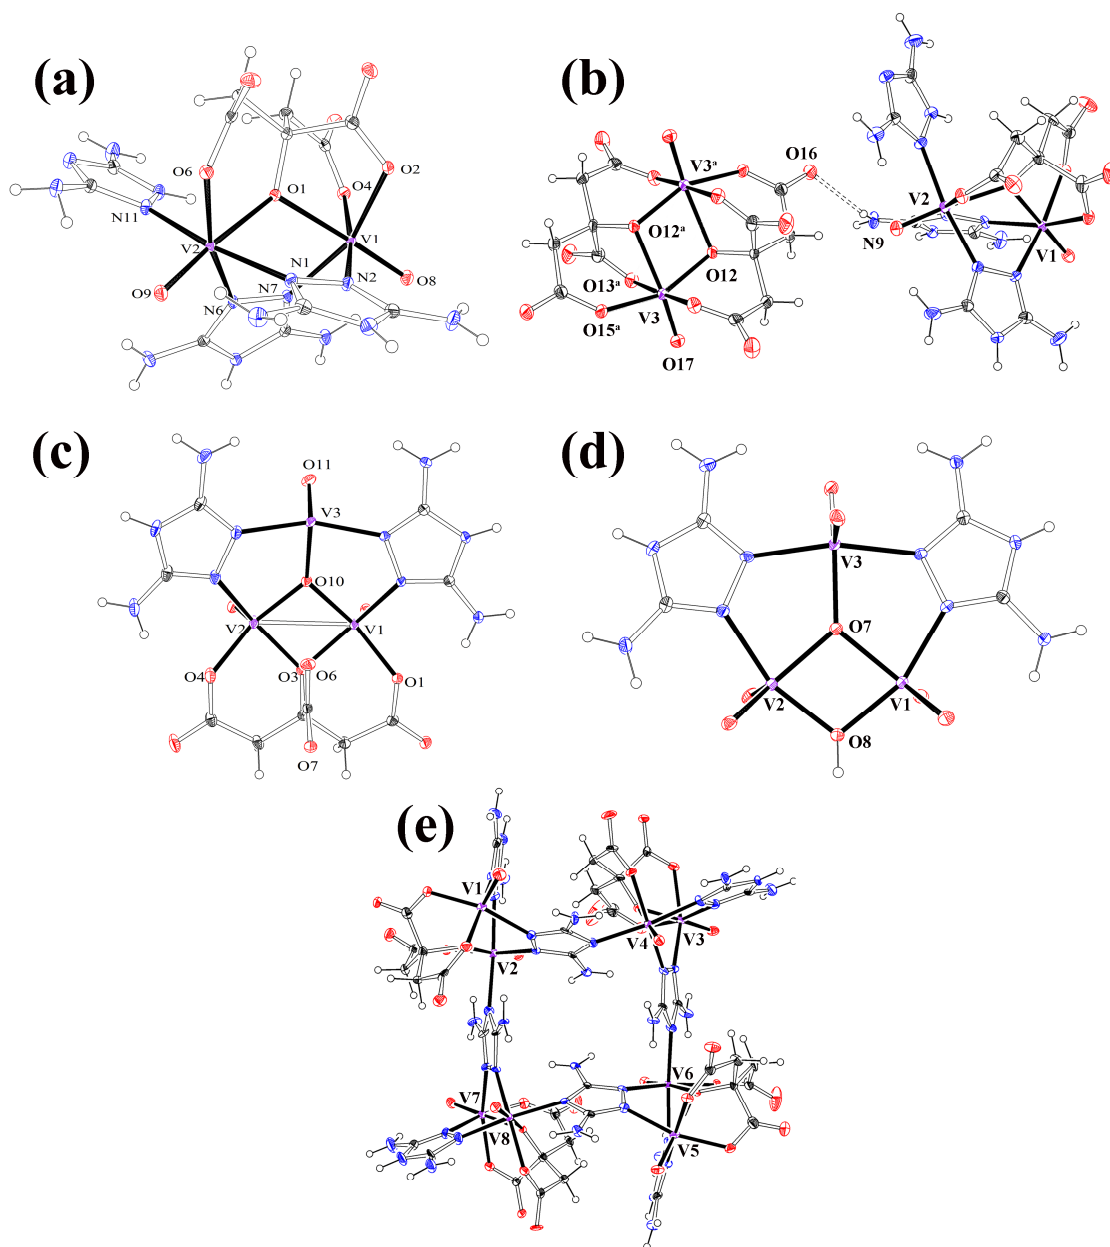

Figure S2. (a – e) ORTEP diagrams of **1 – 5** with thermal ellipsoids drawn at 30% probabilities level. Symmetric code:  $a = 2 - x, 3 - y, -z$ .

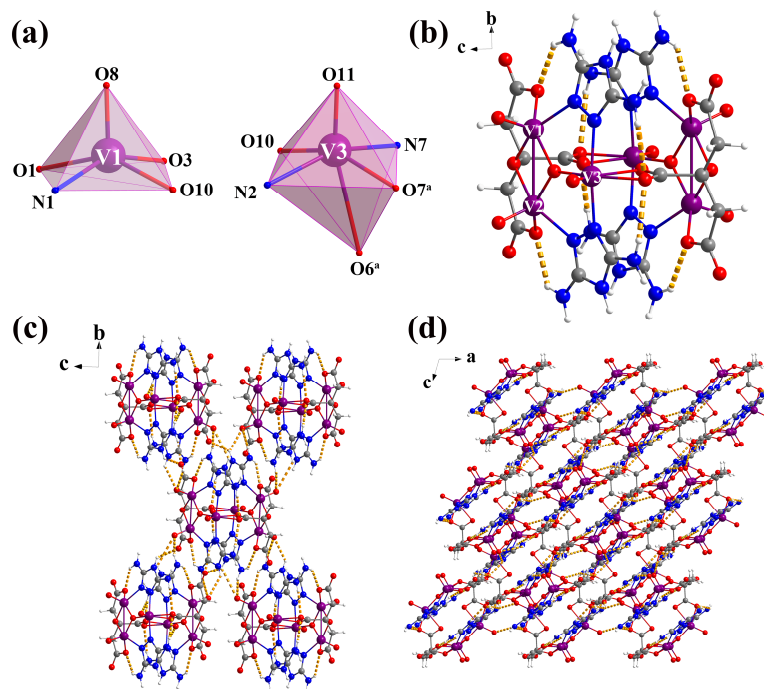

Figure S3. (a) Representation of the coordination environments for V ions in **3**. The intramolecular (b) and intermolecular (c and d) hydrogen bonding networks in **3**. Symmetric code:  $a(1-x, 1-y, 1-z)$ .

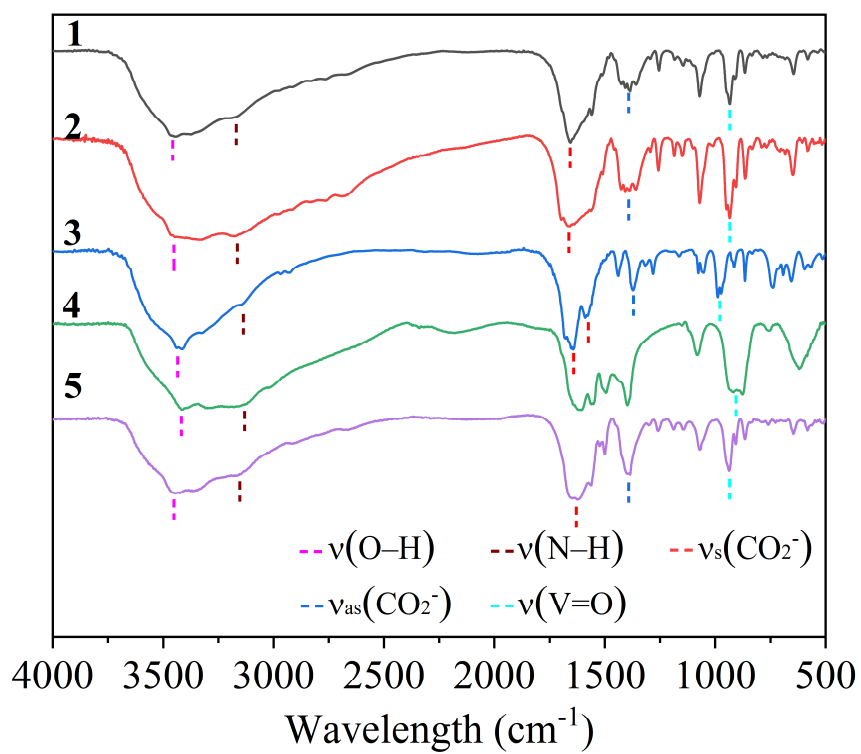

Figure S4. FT-IR spectra of **1–5** using KBr pellets in the 4000–500 cm<sup>-1</sup> region.

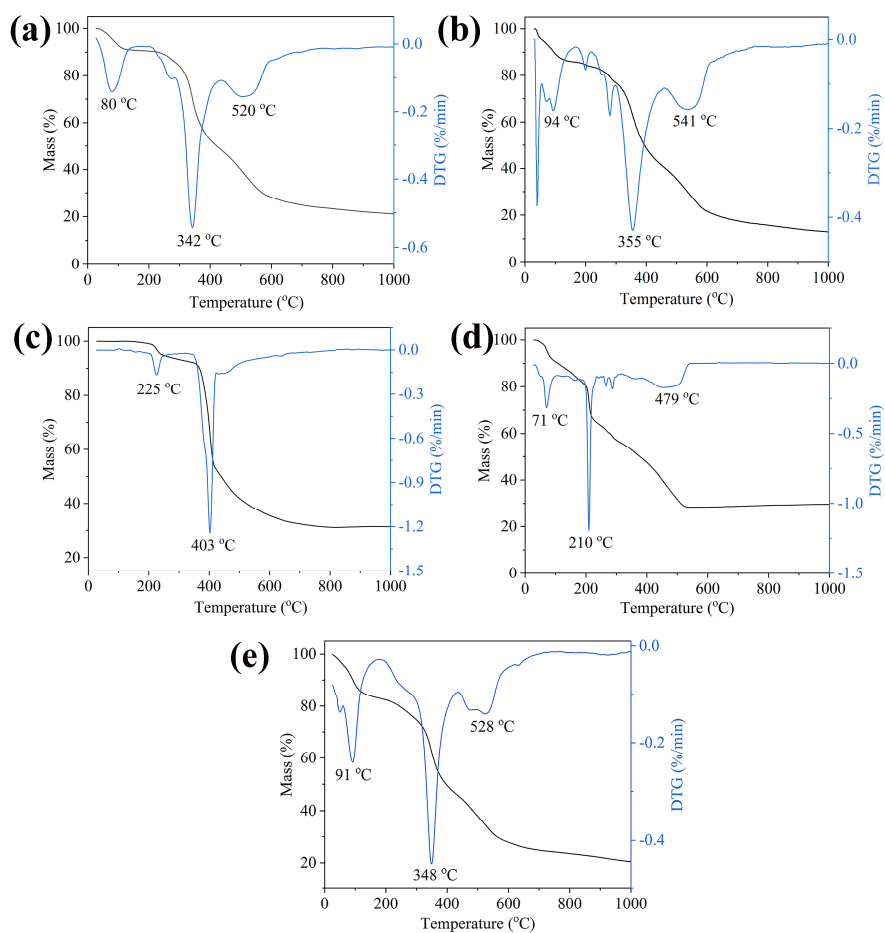

Figure S5. (a – e) TGA curves of **1–5** in N<sub>2</sub> stream at a heating rate of 10 °C min<sup>-1</sup>, respectively.

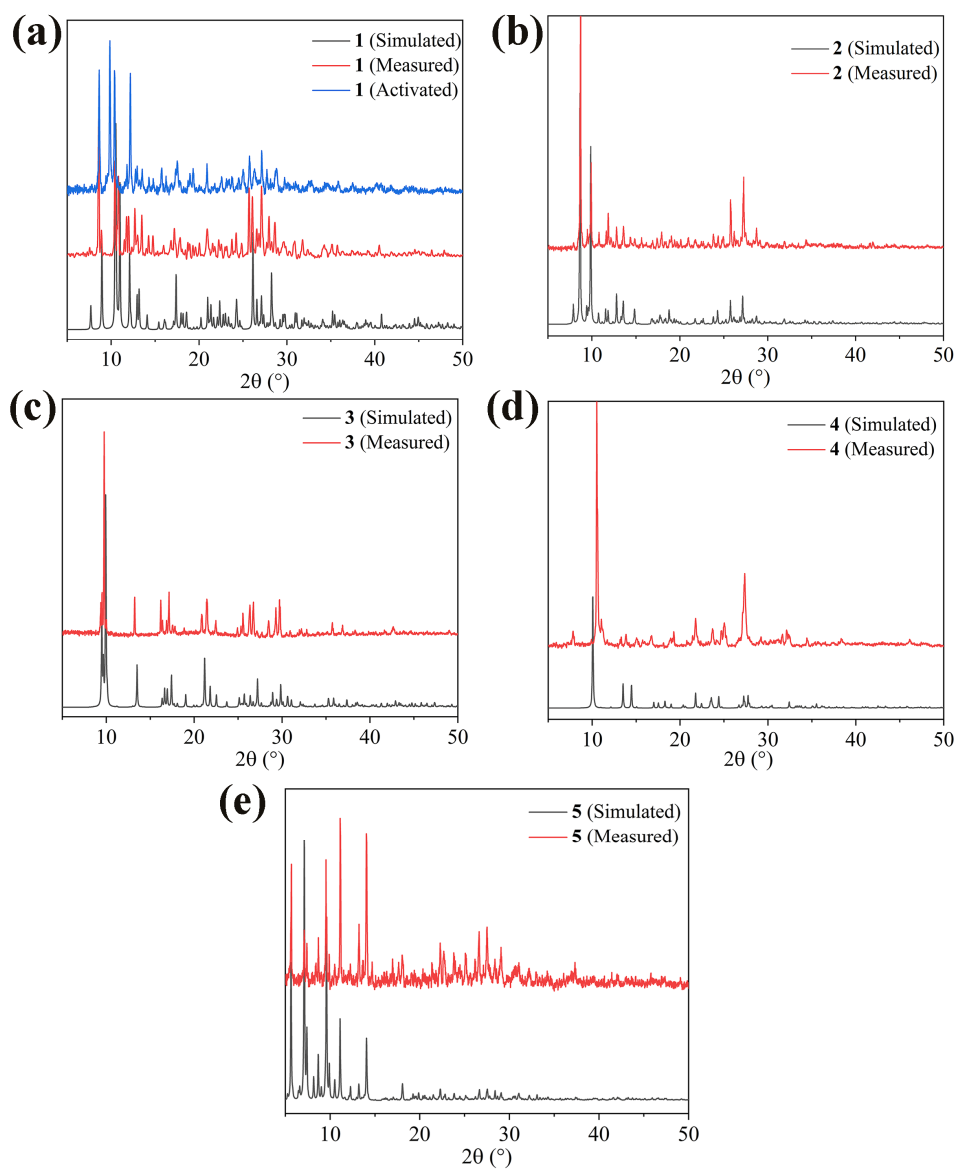

Figure S6. PXRD patterns of as-synthesized and simulated samples **1–5** from  $5^\circ$  to  $50^\circ$  with a scanning speed of  $10^\circ/\text{min}$ , respectively.



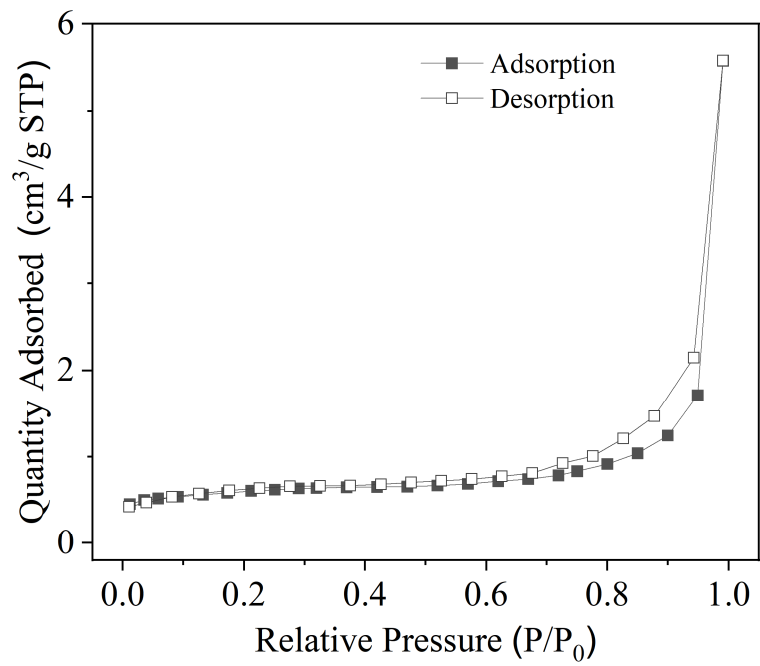

Figure S7. N<sub>2</sub> adsorption-desorption isotherms of **1** at 77 K.

Table S1. Crystallographic data and structural refinement details for  $[\text{V}_2\text{O}_2(\text{cit})(\text{Hdatrz})_3]\cdot 5\text{H}_2\text{O}$  (1),  $[\text{V}_2\text{O}_2(\text{cit})(\text{Hdatrz})_3][\text{V}_2\text{O}_2(\text{cit})_2]_{1/2}\cdot 2\text{H}_2\text{datrz}\cdot 9.5\text{H}_2\text{O}$  (2),  $\text{V}_6\text{O}_6(\mu_3\text{-O})_2(\text{cit})_2(\text{Hdatrz})_4\cdot 4\text{H}_2\text{O}$  (3),  $[\text{V}_3\text{O}_6(\mu_2\text{-OH})(\mu_3\text{-O})(\text{Hdatrz})_2]\cdot 4.5\text{H}_2\text{O}$  (4) and  $\text{K}_2\{[\text{V}^{\text{IV}}/\text{V}_2\text{O}_2(\text{cit})(\text{Hdatrz})(\text{datrz})]_2[\text{V}^{\text{IV}}_2\text{O}_2(\text{cit})(\text{Hdatrz})(\text{datrz})]_2\}\cdot 27.5\text{H}_2\text{O}$  (5), respectively.

|                                                | 1                                                                | 2                                                                  | 3                                                                | 4                                                               | 5                                                                            |
|------------------------------------------------|------------------------------------------------------------------|--------------------------------------------------------------------|------------------------------------------------------------------|-----------------------------------------------------------------|------------------------------------------------------------------------------|
| Empirical formula                              | $\text{C}_{12}\text{H}_{29}\text{N}_{15}\text{O}_{14}\text{V}_2$ | $\text{C}_{22}\text{H}_{53}\text{N}_{25}\text{O}_{26.5}\text{V}_3$ | $\text{C}_{20}\text{H}_{36}\text{N}_{20}\text{O}_{26}\text{V}_6$ | $\text{C}_4\text{H}_{20}\text{N}_{10}\text{O}_{12.5}\text{V}_3$ | $\text{C}_{40}\text{H}_{99}\text{K}_2\text{N}_{40}\text{O}_{63.5}\text{V}_8$ |
| Formula weight                                 | 709.38                                                           | 1244.71                                                            | 1278.33                                                          | 561.12                                                          | 2642.31                                                                      |
| Temperature/K                                  | 100(2)                                                           | 233(1)                                                             | 100(1)                                                           | 100(2)                                                          | 100(1)                                                                       |
| Crystal system                                 | Monoclinic                                                       | Triclinic                                                          | Monoclinic                                                       | Monoclinic                                                      | Monoclinic                                                                   |
| Space group                                    | $P 2_1/c$                                                        | $P \bar{1}$                                                        | $P 2_1/n$                                                        | $P 2_1/n$                                                       | $P 2_1/n$                                                                    |
| a/Å                                            | 10.3068(2)                                                       | 10.4466(4)                                                         | 10.6045(2)                                                       | 10.3231(2)                                                      | 20.3045(2)                                                                   |
| b/Å                                            | 16.4045(2)                                                       | 10.7317(4)                                                         | 18.2772(3)                                                       | 17.2111(3)                                                      | 18.4546(2)                                                                   |
| c/Å                                            | 16.7884(3)                                                       | 22.64026                                                           | 11.2855(2)                                                       | 10.4223(2)                                                      | 26.9082(2)                                                                   |
| $\alpha/^\circ$                                | 90                                                               | 82.025(2)                                                          | 90                                                               | 90                                                              | 90                                                                           |
| $\beta/^\circ$                                 | 106.654(2)                                                       | 89.802(3)                                                          | 106.3481(2)                                                      | 101.788(2)                                                      | 93.6380(2)                                                                   |
| $\gamma/^\circ$                                | 90                                                               | 78.306(3)                                                          | 90                                                               | 90                                                              | 90                                                                           |
| Volume/Å <sup>3</sup>                          | 2719.48(8)                                                       | 2460.67(2)                                                         | 2098.93(7)                                                       | 1812.70(6)                                                      | 10062.49(2)                                                                  |
| Z                                              | 4                                                                | 2                                                                  | 2                                                                | 4                                                               | 4                                                                            |
| $\rho_{\text{calc}}/\text{cm}^3$               | 1.733                                                            | 1.680                                                              | 2.023                                                            | 2.056                                                           | 1.744                                                                        |
| $\mu/\text{mm}^{-1}$                           | 6.611                                                            | 5.681                                                              | 11.833                                                           | 13.549                                                          | 7.819                                                                        |
| $F(000)$                                       | 1456.0                                                           | 1282.0                                                             | 1284.0                                                           | 1132.0                                                          | 5396.0                                                                       |
| Crystal size/mm <sup>3</sup>                   | $0.20 \times 0.15 \times 0.15$                                   | $0.15 \times 0.1 \times 0.1$                                       | $0.15 \times 0.1 \times 0.1$                                     | $0.15 \times 0.10 \times 0.10$                                  | $0.20 \times 0.15 \times 0.10$                                               |
| Radiation                                      | Cu K $\alpha$ ( $\lambda = 1.54184$ )                            | Cu K $\alpha$ ( $\lambda = 1.54184$ )                              | Cu K $\alpha$ ( $\lambda = 1.54184$ )                            | Cu K $\alpha$ ( $\lambda = 1.54184$ )                           | Cu K $\alpha$ ( $\lambda = 1.54184$ )                                        |
| 2 $\theta$ range for data collection/ $^\circ$ | 7.698 to 148.748                                                 | 8.330 to 133.978                                                   | 8.330 to 133.978                                                 | 10.078 to 150.012                                               | 5.294 to 139.46                                                              |
| Reflections collected                          | 17071                                                            | 16902                                                              | 13873                                                            | 10675                                                           | 71737                                                                        |
| Independent reflections                        | 5267                                                             | 8843                                                               | 4055                                                             | 3054                                                            | 18443                                                                        |

|                                                         |                                     |                                     |                                     |                                     |                                     |
|---------------------------------------------------------|-------------------------------------|-------------------------------------|-------------------------------------|-------------------------------------|-------------------------------------|
| $R_{\text{int}}$                                        | 0.0367                              | 0.0507                              | 0.0371                              | 0.0589                              | 0.0428                              |
| Data/restraints/parameters                              | 5267/25/430                         | 8843/289/668                        | 4055/0/308                          | 3504/0/235                          | 18443/78/1256                       |
| Goodness of fit on $F^2$                                | 1.049                               | 1.082                               | 1.056                               | 1.072                               | 1.051                               |
| Final $R$ indexes [ $I \geq 2\sigma(I)$ ]               | $R_1 = 0.0326$ , $wR_2 =$<br>0.0845 | $R_1 = 0.0608$ , $wR_2 =$<br>0.1435 | $R_1 = 0.0311$ , $wR_2 =$<br>0.0796 | $R_1 = 0.0537$ , $wR_2 =$<br>0.1505 | $R_1 = 0.0483$ , $wR_2 =$<br>0.1365 |
| Final $R$ indexes [all data]                            | $R_1 = 0.0360$ , $wR_2 =$<br>0.0866 | $R_1 = 0.0742$ , $wR_2 =$<br>0.1502 | $R_1 = 0.0330$ , $wR_2 =$<br>0.0811 | $R_1 = 0.0568$ , $wR_2 =$<br>0.1536 | $R_1 = 0.0557$ , $wR_2 =$<br>0.1424 |
| Largest diff. peak and hole / $\text{e}\text{\AA}^{-3}$ | 0.39/-0.41                          | 0.55/-0.47                          | 0.38/-0.40                          | 1.24/-1.31                          | 1.00/-0.67                          |

---

Table S2. Selected bond distances (Å) and angles (°) for  $[\text{V}_2\text{O}_2(\text{cit})(\text{Hdatrz})_3]\cdot 5\text{H}_2\text{O}$  (**1**),  $[\text{V}_2\text{O}_2(\text{cit})(\text{Hdatrz})_3][\text{V}_2\text{O}_2(\text{cit})_2]_{1/2}\cdot 2\text{H}_2\text{datrz}\cdot 9.5\text{H}_2\text{O}$  (**2**),  $\text{V}_6\text{O}_6(\mu_3\text{-O})_2(\text{cit})_2(\text{Hdatrz})_4\cdot 4\text{H}_2\text{O}$  (**3**),  $[\text{V}_3\text{O}_6(\mu_2\text{-OH})(\mu_3\text{-O})(\text{Hdatrz})_2]\cdot 4.5\text{H}_2\text{O}$  (**4**) and  $\text{K}_2\{[\text{V}^{\text{IV/V}}\text{V}_2\text{O}_2(\text{cit})(\text{Hdatrz})(\text{datrz})]_2[\text{V}^{\text{IV}}\text{V}_2\text{O}_2(\text{cit})(\text{Hdatrz})(\text{datrz})]_2\}\cdot 27.5\text{H}_2\text{O}$  (**5**), respectively.

| <b>1</b> |           |                     |           |
|----------|-----------|---------------------|-----------|
| V1–O1    | 2.0803(2) | V2–O1               | 2.0810(2) |
| V1–O4    | 2.0204(2) | V2–O6               | 2.0184(2) |
| V1–O2    | 2.0294(2) | V2–O9               | 1.6154(2) |
| V1–O8    | 1.6202(2) | V2–N1               | 2.1103(2) |
| V1–N2    | 2.0856(2) | V2–N11              | 2.0919(2) |
| V1–N7    | 2.0571(2) | V2–N6               | 2.0872(2) |
|          |           |                     |           |
| O1–V1–N2 | 84.48(7)  | O1–V2–N1            | 82.48(6)  |
| O4–V1–O1 | 84.91(6)  | O1–V2–N11           | 88.66(7)  |
| O4–V1–O2 | 87.18(7)  | O1–V2–N6            | 79.03(6)  |
| O4–V1–N2 | 169.02(7) | O6–V2–O1            | 85.56(6)  |
| O4–V1–N7 | 93.25(7)  | O6–V2–N1            | 87.69(7)  |
| O2–V1–O1 | 78.16(6)  | O6–V2–N11           | 92.28(7)  |
| O2–V1–N2 | 87.87(7)  | O6–V2–N6            | 164.51(7) |
| O2–V1–N7 | 157.25(7) | O9–V2–O1            | 175.38(7) |
| O8–V1–O1 | 177.88(7) | O9–V2–O6            | 97.55(7)  |
| O8–V1–O4 | 96.23(7)  | O9–V2–N1            | 94.20(8)  |
| O8–V1–O2 | 103.66(7) | O9–V2–N11           | 94.61(8)  |
| O8–V1–N2 | 94.46(8)  | O9–V2–N6            | 97.74(8)  |
| O8–V1–N7 | 98.91(8)  | N11–V2–N1           | 171.12(7) |
| N7–V1–O1 | 79.22(6)  | N6–V2–N1            | 88.79(7)  |
| N7–V1–N2 | 87.55(7)  | N6–V2–N11           | 88.91(7)  |
|          |           |                     |           |
| <b>2</b> |           |                     |           |
| V1–O3    | 2.062(3)  | V2–N6               | 2.081(3)  |
| V1–O6    | 2.014(3)  | V2–N11              | 2.101(4)  |
| V1–O4    | 2.019(3)  | V2–N1               | 2.087(4)  |
| V1–O9    | 1.620(3)  | V3–O12 <sup>a</sup> | 2.188(3)  |
| V1–N7    | 2.080(3)  | V3–O12              | 1.971(3)  |
| V1–N2    | 2.080(4)  | V3–O10              | 2.037(3)  |
| V2–O3    | 2.082(3)  | V3–O15 <sup>a</sup> | 2.033(3)  |
| V2–O1    | 2.012(3)  | V3–O13 <sup>a</sup> | 2.059(3)  |
| V2–O8    | 1.608(3)  | V3–O17              | 1.611(3)  |

|           |           |                          |           |
|-----------|-----------|--------------------------|-----------|
| O4-V1-N2  | 88.91(2)  | O3-V2-N11                | 90.65(2)  |
| O9-V1-O3  | 179.29(2) | O3-V2-N1                 | 81.62(2)  |
| O9-V1-O6  | 96.19(2)  | O1-V2-O3                 | 85.52(2)  |
| O9-V1-O4  | 101.71(2) | O1-V2-N6                 | 164.69(2) |
| O9-V1-N7  | 98.92(2)  | O1-V2-N11                | 91.04(2)  |
| O9-V1-N2  | 95.33(2)  | O1-V2-N1                 | 87.12(2)  |
| N7-V1-N2  | 86.73(2)  | O8-V2-O3                 | 174.65(2) |
| O3-V1-N7  | 80.59(2)  | O12-V3-O12 <sup>a</sup>  | 74.96(2)  |
| O3-V1-N2  | 84.13(2)  | O12-V3-O10               | 87.50(2)  |
| O6-V1-O3  | 84.36(2)  | O12-V3-O15 <sup>a</sup>  | 153.61(2) |
| O6-V1-O4  | 87.05(2)  | O12-V3-O13 <sup>a</sup>  | 92.46(2)  |
| O6-V1-N7  | 93.20(2)  | O10-V3-O12 <sup>a</sup>  | 101.31(2) |
| O6-V1-N2  | 168.35(2) | O10-V3-O13 <sup>a</sup>  | 176.52(2) |
| O4-V1-O3  | 78.75(2)  | O151-V3-O12 <sup>a</sup> | 80.24(2)  |
| O4-V1-N7  | 159.22(2) | O151-V3-O10              | 88.66(2)  |
| O8-V2-O1  | 96.92(2)  | O151-V3-O13 <sup>a</sup> | 89.84(2)  |
| O8-V2-N6  | 97.83(2)  | O131-V3-O12 <sup>a</sup> | 75.33(2)  |
| O8-V2-N11 | 94.06(2)  | O17-V3-O12               | 105.47(2) |
| O8-V2-N1  | 93.72(2)  | O17-V3-O12 <sup>a</sup>  | 163.86(2) |
| N6-V2-O3  | 79.44(2)  | O17-V3-O10               | 94.82(2)  |
| N6-V2-N11 | 91.98(2)  | O17-V3-O15 <sup>a</sup>  | 100.87(2) |
| N6-V2-N1  | 87.87(2)  | O17-V3-O13 <sup>a</sup>  | 88.55(2)  |
| N1-V2-N11 | 172.17(2) |                          |           |

Symmetric codes: (a) 2 - x, 3 - y, -z

### 3

|                    |            |                        |            |
|--------------------|------------|------------------------|------------|
| V1-V2              | 2.8560(5)  | V3-O11                 | 1.6020(17) |
| V1-O3              | 2.0001(16) | V3-N2                  | 2.0621(19) |
| V1-O1              | 1.9875(16) | V3-N7                  | 2.075(2)   |
| V1-O10             | 1.9130(15) | V2-O3                  | 1.9868(16) |
| V1-O8              | 1.5960(16) | V2-O10                 | 1.9092(16) |
| V1-N1              | 2.0723(18) | V2-O4                  | 1.9936(17) |
| V3-O10             | 1.8888(16) | V2-O9                  | 1.6012(17) |
| V3-O7 <sup>a</sup> | 2.0632(16) | V2-N6                  | 2.063(2)   |
| V3-O6 <sup>a</sup> | 2.4330(16) |                        |            |
| O3-V1-V2           | 44.06(4)   | O11-V3-O7 <sup>a</sup> | 97.97(8)   |
| O3-V1-N1           | 154.30(7)  | O11-V3-O6 <sup>a</sup> | 155.76(8)  |
| O1-V1-V2           | 126.88(5)  | O11-V3-N2              | 100.24(9)  |
| O1-V1-O3           | 89.17(6)   | O11-V3-N7              | 101.93(9)  |
| O1-V1-N1           | 86.86(7)   | N2-V3-O7 <sup>a</sup>  | 91.60(7)   |
| O10-V1-V2          | 41.60(5)   | N2-V3-O6 <sup>a</sup>  | 80.20(7)   |
| O10-V1-O3          | 85.54(6)   | N2-V3-N7               | 157.54(8)  |
| O10-V1-O1          | 147.30(7)  | N7-V3-O6 <sup>a</sup>  | 81.12(7)   |

|                        |           |           |           |
|------------------------|-----------|-----------|-----------|
| O10-V1-N1              | 84.21(7)  | O3-V2-V1  | 44.43(4)  |
| O8-V1-V2               | 109.23(6) | O3-V2-O4  | 88.56(7)  |
| O8-V1-O3               | 103.23(8) | O3-V2-N6  | 155.61(7) |
| O8-V1-O1               | 104.29(8) | O10-V2-V1 | 41.70(5)  |
| O8-V1-O10              | 108.34(8) | O10-V2-O3 | 86.01(6)  |
| O8-V1-N1               | 102.35(8) | O10-V2-O4 | 149.28(7) |
| N1-V1-V2               | 123.12(5) | O10-V2-N6 | 84.87(7)  |
| O10-V3-O7 <sup>a</sup> | 153.34(7) | O4-V2-V1  | 127.46(5) |
| O10-V3-O6 <sup>a</sup> | 95.52(6)  | O4-V2-N6  | 87.82(8)  |
| O10-V3-N2              | 84.51(7)  | O9-V2-V1  | 109.07(7) |
| O10-V3-N7              | 84.99(7)  | O9-V2-O3  | 104.07(8) |
| O71-V3-O6 <sup>a</sup> | 57.86(6)  | O9-V2-O10 | 107.21(8) |
| O71-V3-N7              | 88.94(7)  | O9-V2-O4  | 103.45(8) |
| O11-V3-O10             | 108.68(8) | O9-V2-N6  | 100.23(8) |

Symmetric codes: (a)  $1 - x$ ,  $1 - y$ ,  $1 - z$

#### 4

|          |           |          |           |
|----------|-----------|----------|-----------|
| V1-V2    | 3.0453(9) | V3-O6    | 1.624(3)  |
| V1-O7    | 1.978(3)  | V3-N2    | 2.060(3)  |
| V1-O8    | 1.935(3)  | V3-N7    | 2.056(3)  |
| V1-O1    | 1.639(3)  | V2-O7    | 1.982(3)  |
| V1-O2    | 1.642(3)  | V2-O8    | 1.942(3)  |
| V1-N1    | 2.061(3)  | V2-O3    | 1.634(3)  |
| V3-O7    | 1.971(3)  | V2-O4    | 1.636(3)  |
| V3-O5    | 1.656(3)  | V2-N6    | 2.056(3)  |
| O7-V1-N1 | 82.51(2)  | O6-V3-N2 | 97.83(2)  |
| O8-V1-O7 | 77.84(2)  | O6-V3-N7 | 97.81(2)  |
| O8-V1-N1 | 157.94(2) | N7-V3-N2 | 161.54(2) |
| O1-V1-O7 | 136.73(2) | O7-V2-N6 | 81.33(2)  |
| O1-V1-O8 | 96.47(2)  | O8-V2-O7 | 77.59(2)  |
| O1-V1-O2 | 108.19(2) | O8-V2-N6 | 157.70(2) |
| O1-V1-N1 | 90.96(2)  | O3-V2-O7 | 117.01(2) |
| O2-V1-O7 | 115.04(2) | O3-V2-O8 | 98.93(2)  |
| O2-V1-O8 | 100.49(2) | O3-V2-O4 | 108.49(2) |
| O2-V1-N1 | 96.83(2)  | O3-V2-N6 | 97.03(2)  |
| O7-V3-N2 | 82.83(2)  | O4-V2-O7 | 134.50(2) |
| O7-V3-N7 | 82.56(2)  | O4-V2-O8 | 96.80(2)  |
| O5-V3-O7 | 143.67(2) | O4-V2-N6 | 92.77(2)  |
| O5-V3-N2 | 92.39(2)  | V1-O7-V2 | 100.54(2) |
| O5-V3-N7 | 92.71(2)  | V3-O7-V1 | 129.38(2) |
| O6-V3-O7 | 110.45(2) | V3-O7-V2 | 130.01(2) |
| O6-V3-O5 | 105.88(2) | V1-O8-V2 | 103.53(2) |

## 5

|          |           |            |           |
|----------|-----------|------------|-----------|
| V1-O3    | 2.100(2)  | V5-O18     | 2.096(2)  |
| V1-O4    | 2.016(2)  | V5-O19     | 2.037(2)  |
| V1-O6    | 2.023(3)  | V5-O21     | 2.015(2)  |
| V1-O9    | 1.614(3)  | V5-O24     | 1.617(3)  |
| V1-N2    | 2.095(3)  | V5-N22     | 2.094(3)  |
| V1-N7    | 2.081(3)  | V5-N27     | 2.065(3)  |
| V2-O1    | 2.005(2)  | V6-O35     | 2.006(2)  |
| V2-O3    | 2.092(2)  | V6-O18     | 2.085(2)  |
| V2-O8    | 1.613(2)  | V6-O23     | 1.615(2)  |
| V2-N1    | 2.076(3)  | V6-N18     | 2.103(3)  |
| V2-N6    | 2.079(3)  | V6-N21     | 2.075(3)  |
| V2-N38   | 2.101(3)  | V6-N26     | 2.065(3)  |
| V3-O11   | 2.093(2)  | V7-O27     | 2.088(2)  |
| V3-O12   | 1.996(3)  | V7-O28     | 2.009(2)  |
| V3-O14   | 2.001(2)  | V7-O30     | 2.020(2)  |
| V3-O17   | 1.620(3)  | V7-O33     | 1.615(2)  |
| V3-N11   | 2.093(3)  | V7-N31     | 2.101(3)  |
| V3-N16   | 2.071(3)  | V7-N37     | 2.076(3)  |
| V4-O16   | 1.619(3)  | V8-O25     | 2.021(2)  |
| V4-O11   | 2.048(2)  | V8-O27     | 2.049(2)  |
| V4-O34   | 2.024(2)  | V8-O32     | 1.619(2)  |
| V4-N8    | 2.121(3)  | V8-N28     | 2.113(3)  |
| V4-N12   | 2.104(3)  | V8-N32     | 2.114(3)  |
| V4-N17   | 2.081(3)  | V8-N36     | 2.088(3)  |
|          |           |            |           |
| O4-V1-O3 | 78.88(9)  | O19-V5-O18 | 78.02(9)  |
| O4-V1-O6 | 88.15(1)  | O19-V5-N22 | 86.20(1)  |
| O4-V1-N2 | 86.76(2)  | O19-V5-N27 | 157.36(2) |
| O4-V1-N7 | 157.65(2) | O21-V5-O18 | 83.60(1)  |
| O6-V1-O3 | 82.64(1)  | O21-V5-O19 | 86.84(1)  |
| O6-V1-N2 | 166.45(2) | O21-V5-N22 | 167.29(2) |
| O6-V1-N7 | 92.16(2)  | O21-V5-N27 | 93.60(1)  |
| O9-V1-O3 | 177.41(2) | O24-V5-O18 | 176.73(1) |
| O9-V1-O4 | 103.43(2) | O24-V5-O19 | 105.03(1) |
| O9-V1-O6 | 98.55(3)  | O24-V5-O21 | 97.67(2)  |
| O9-V1-N2 | 94.85(3)  | O24-V5-N22 | 94.40(2)  |
| O9-V1-N7 | 98.62(2)  | O24-V5-N27 | 97.35(2)  |
| N2-V1-O3 | 84.05(1)  | N22-V5-O18 | 84.56(1)  |
| N7-V1-O3 | 79.00(1)  | N27-V5-O18 | 79.54(1)  |
| N7-V1-N2 | 87.82(2)  | N27-V5-N22 | 88.77(2)  |
| O1-V2-O3 | 85.63(1)  | O35-V6-O18 | 85.92(1)  |
| O1-V2-N1 | 86.49(2)  | O35-V6-N18 | 90.08(1)  |
| O1-V2-N6 | 164.91(2) | O35-V6-N21 | 87.28(1)  |

|            |           |            |           |
|------------|-----------|------------|-----------|
| O1-V2-N38  | 90.15(1)  | O35-V6-N26 | 165.59(2) |
| O3-V2-N38  | 87.81(1)  | O18-V6-N18 | 86.11(1)  |
| O8-V2-O1   | 97.59(2)  | O23-V6-O35 | 98.52(1)  |
| O8-V2-O3   | 175.12(1) | O23-V6-O18 | 174.95(1) |
| O8-V2-N1   | 94.15(2)  | O23-V6-N18 | 96.26(2)  |
| O8-V2-N6   | 97.07(2)  | O23-V6-N21 | 94.59(2)  |
| O8-V2-N38  | 95.83(1)  | O23-V6-N26 | 95.79(1)  |
| N1-V2-O3   | 82.34(1)  | N21-V6-O18 | 83.16(2)  |
| N1-V2-N6   | 88.91(1)  | N21-V6-N18 | 169.10(2) |
| N1-V2-N38  | 169.81(2) | N26-V6-O18 | 79.71(1)  |
| N6-V2-O3   | 79.52(1)  | N26-V6-N18 | 90.03(1)  |
| N6-V2-N38  | 91.89(1)  | N26-V6-N21 | 89.92(1)  |
| O11-V3-N11 | 82.15(1)  | O27-V7-N31 | 84.63(1)  |
| O12-V3-O11 | 83.22(1)  | O28-V7-O27 | 83.18(9)  |
| O12-V3-O14 | 87.95(1)  | O28-V7-O30 | 88.55(1)  |
| O12-V3-N11 | 165.37(2) | O28-V7-N31 | 167.81(1) |
| O12-V3-N16 | 91.70(2)  | O28-V7-N37 | 93.67(1)  |
| O14-V3-O11 | 79.56(9)  | O30-V7-O27 | 78.10(9)  |
| O14-V3-N11 | 88.88(2)  | O30-V7-N31 | 88.74(1)  |
| O14-V3-N16 | 160.38(2) | O30-V7-N37 | 158.57(2) |
| O17-V3-O11 | 176.92(2) | O33-V7-O27 | 178.92(2) |
| O17-V3-O12 | 99.40(2)  | O33-V7-O28 | 97.70(1)  |
| O17-V3-O14 | 102.07(2) | O33-V7-O30 | 102.51(2) |
| O17-V3-N11 | 95.23(2)  | O33-V7-N31 | 94.49(2)  |
| O17-V3-N16 | 97.35(2)  | O33-V7-N37 | 98.31(2)  |
| N16-V3-O11 | 80.91(1)  | N37-V7-O27 | 81.00(9)  |
| N16-V3-N11 | 86.54(2)  | N37-V7-N31 | 84.61(2)  |
| O16-V4-O11 | 175.00(2) | O25-V8-O27 | 87.07(9)  |
| O16-V4-O34 | 95.27(2)  | O25-V8-N28 | 91.13(1)  |
| O16-V4-N8  | 96.10(2)  | O25-V8-N32 | 89.70(1)  |
| O16-V4-N12 | 93.64(2)  | O25-V8-N36 | 167.48(2) |
| O16-V4-N17 | 96.40(2)  | O27-V8-N28 | 88.47(1)  |
| O11-V4-N8  | 88.51(2)  | O27-V8-N32 | 83.04(1)  |
| O11-V4-N12 | 81.68(2)  | O27-V8-N36 | 80.83(1)  |
| O11-V4-N17 | 81.53(2)  | O32-V8-O25 | 96.16(2)  |
| O34-V4-O11 | 86.40(1)  | O32-V8-O27 | 174.89(1) |
| O34-V4-N8  | 92.84(1)  | O32-V8-N28 | 95.40(2)  |
| O34-V4-N12 | 88.57(2)  | O32-V8-N32 | 93.00(2)  |
| O34-V4-N17 | 167.14(2) | O32-V8-N36 | 95.69(2)  |
| N12-V4-N8  | 169.99(2) | N28-V8-N32 | 171.42(2) |
| N17-V4-N8  | 91.26(1)  | N36-V8-N28 | 91.76(1)  |
| N17-V4-N12 | 85.33(2)  | N36-V8-N32 | 85.66(1)  |

---



Table S3. Hydrogen bonds observed in  $[\text{V}_2\text{O}_2(\text{cit})(\text{Hdatrz})_3] \cdot 5\text{H}_2\text{O}$  (**1**),  $[\text{V}_2\text{O}_2(\text{cit})(\text{Hdatrz})_3][\text{V}_2\text{O}_2(\text{cit})_2]_{1/2} \cdot 2\text{H}_2\text{datrz} \cdot 9.5\text{H}_2\text{O}$  (**2**),  $\text{V}_6\text{O}_6(\mu_3\text{-O})_2(\text{cit})_2(\text{Hdatrz})_4 \cdot 4\text{H}_2\text{O}$  (**3**),  $[\text{V}_3\text{O}_6(\mu_2\text{-OH})(\mu_3\text{-O})(\text{Hdatrz})_2] \cdot 4.5\text{H}_2\text{O}$  (**4**) and  $\text{K}_2\{[\text{V}^{\text{IV/V}}\text{V}_2\text{O}_2(\text{cit})(\text{Hdatrz})(\text{datrz})]_2[\text{V}^{\text{IV}}\text{V}_2\text{O}_2(\text{cit})(\text{Hdatrz})(\text{datrz})]_2\} \cdot 27.5\text{H}_2\text{O}$  (**5**), respectively.

| D–H···A                                                                                                                                                       | D–H (Å) | H···A (Å) | D···A (Å) | D–H···A(°) |
|---------------------------------------------------------------------------------------------------------------------------------------------------------------|---------|-----------|-----------|------------|
| <b>1</b>                                                                                                                                                      |         |           |           |            |
| N8–H8···O3 <sup>a</sup>                                                                                                                                       | 0.88(2) | 1.99(2)   | 2.769(4)  | 146.22(2)  |
| N9–H9A···O7 <sup>a</sup>                                                                                                                                      | 0.88(2) | 2.06(3)   | 2.821(2)  | 144.66(2)  |
| N9–H9A···O8 <sup>b</sup>                                                                                                                                      | 0.88(3) | 2.18(1)   | 2.896(2)  | 138.47(1)  |
| N10–H10A···O8 <sup>c</sup>                                                                                                                                    | 0.88(2) | 2.25(2)   | 2.896(2)  | 129.44(1)  |
| N12–H12···O5 <sup>d</sup>                                                                                                                                     | 0.88(1) | 2.01(2)   | 2.750(2)  | 140.38(2)  |
| Symmetric codes: (a) $-1 + x, y, z$ ; (b) $1 - x, \frac{1}{2} + y, \frac{1}{2} - z$ ; (c) $1 - x, -\frac{1}{2} + y, \frac{1}{2} - z$ ; (d) $1 - x, 1 - y, -z$ |         |           |           |            |
| <b>2</b>                                                                                                                                                      |         |           |           |            |
| N3–H3···O15 <sup>a</sup>                                                                                                                                      | 0.87(1) | 1.95(2)   | 2.811(2)  | 170.20(3)  |
| N4–H4B···O17 <sup>b</sup>                                                                                                                                     | 0.87(2) | 2.09(3)   | 2.944(2)  | 169.00(3)  |
| N5–H5B···O16 <sup>a</sup>                                                                                                                                     | 0.87(3) | 2.11(3)   | 2.897(2)  | 149.20(2)  |
| N8–H8···O2 <sup>c</sup>                                                                                                                                       | 0.87(2) | 1.93(2)   | 2.658(2)  | 141.20(2)  |
| N9–H9A···O16                                                                                                                                                  | 0.87(2) | 2.23(2)   | 2.900(2)  | 134.20(2)  |
| N10–H10B···O5 <sup>c</sup>                                                                                                                                    | 0.87(1) | 2.09(2)   | 2.960(2)  | 175.21(2)  |
| N12–H12···O7 <sup>d</sup>                                                                                                                                     | 0.87(3) | 1.99(2)   | 2.728(2)  | 141.50(1)  |
| N15–H15A···O6 <sup>d</sup>                                                                                                                                    | 0.87(2) | 2.17(2)   | 2.991(2)  | 158.22(3)  |
| N18–H18B···O10 <sup>b</sup>                                                                                                                                   | 0.87(2) | 2.10(2)   | 2.921(2)  | 158.12(2)  |
| N19–H19B···O11 <sup>b</sup>                                                                                                                                   | 0.87(2) | 2.14(3)   | 2.927(6)  | 149.50(4)  |
| N9–H9B···O11 <sup>b</sup>                                                                                                                                     | 0.87(2) | 2.14(2)   | 2.923(2)  | 149.50(4)  |
| Symmetric codes: (a) $x, -1 + y, z$ ; (b) $2 - x, 2 - y, -z$ ; (c) $1 + x, y, z$ ; (d) $2 - x, 2 - y, 1 - z$                                                  |         |           |           |            |

**3**

|                            |         |         |          |           |
|----------------------------|---------|---------|----------|-----------|
| N5–H5A···O1                | 0.88(2) | 2.15(2) | 2.858(3) | 137.24(2) |
| N9–H9A···O4                | 0.88(3) | 2.16(3) | 2.872(3) | 137.24(2) |
| N4–H4A···O7 <sup>a</sup>   | 0.88(2) | 2.47(2) | 3.081(3) | 117.16(2) |
| N10–H10A···O7 <sup>a</sup> | 0.88(3) | 2.35(2) | 3.002(3) | 130.65(2) |
| N3–H3···O2 <sup>b</sup>    | 0.88(2) | 2.13(2) | 2.808(3) | 132.56(2) |
| N4–H4B···O2 <sup>b</sup>   | 0.88(2) | 2.06(1) | 2.816(3) | 143.21(2) |
| N8–H8···O5 <sup>c</sup>    | 0.88(3) | 2.58(3) | 3.174(3) | 125.32(2) |
| N4–H4A···O11 <sup>d</sup>  | 0.88(2) | 2.13(3) | 2.873(3) | 142.22(2) |
| N8–H8···O8 <sup>e</sup>    | 0.88(2) | 2.24(2) | 2.929(3) | 135.35(1) |
| N10–H10B···O5 <sup>e</sup> | 0.88(3) | 1.93(2) | 2.758(3) | 155.64(2) |
| N5–H5B···O9 <sup>f</sup>   | 0.88(2) | 2.27(3) | 3.027(3) | 143.69(2) |

Symmetric codes: (a)  $1 - x, 1 - y, 1 - z$ ; (b)  $\frac{1}{2} + x, \frac{3}{2} - y, -\frac{1}{2} + z$ ; (c)  $\frac{1}{2} + x, \frac{1}{2} - y, -\frac{1}{2} + z$ ;  
(d)  $1 - x, 1 - y, 2 - z$ ; (e)  $\frac{3}{2} - x, \frac{1}{2} + y, \frac{3}{2} - z$ ; (f)  $\frac{3}{2} - x, -\frac{1}{2} + y, \frac{3}{2} - z$

#### 4

|                         |         |         |          |           |
|-------------------------|---------|---------|----------|-----------|
| N8–H8···O8 <sup>a</sup> | 0.88(2) | 1.79(2) | 2.605(4) | 153.70(2) |
|-------------------------|---------|---------|----------|-----------|

Symmetric codes: (a)  $\frac{1}{2} + x, \frac{1}{2} - y, -\frac{1}{2} + z$

#### 5

|                            |         |         |          |           |
|----------------------------|---------|---------|----------|-----------|
| N20–H20A···O16             | 0.88(2) | 2.34(2) | 2.971(7) | 128.30(8) |
| N39–H39A···O32             | 0.88(3) | 2.36(1) | 2.954(1) | 125.20(7) |
| N3–H3···O20 <sup>a</sup>   | 0.88(1) | 1.93(2) | 2.750(1) | 155.10(2) |
| N13–H13···O30 <sup>b</sup> | 0.88(2) | 1.97(3) | 2.776(1) | 151.01(8) |
| N23–H23···O5 <sup>c</sup>  | 0.88(3) | 1.87(2) | 2.741(1) | 169.50(8) |
| N25–H25B···O2 <sup>c</sup> | 0.88(2) | 2.09(2) | 2.972(1) | 177.40(9) |
| N33–H33···O15 <sup>d</sup> | 0.88(2) | 1.93(3) | 2.786(1) | 164.01(7) |

(c)  $\frac{1}{2} + x, \frac{3}{2} - y, -\frac{1}{2} + z$ ; (d)  $\frac{1}{2} + x, \frac{3}{2} - y, \frac{1}{2} + z$

---

Table S4. Bond valence sum calculations for **1–5**, respectively.

| Complexes | Atoms          | n        | s            | d            | Assignment            |
|-----------|----------------|----------|--------------|--------------|-----------------------|
| <b>1</b>  | V1             | 4        | 4.226        | 0.226        |                       |
|           | V2             | 4        | 4.206        | 0.206        |                       |
|           | <b>average</b> | <b>4</b> | <b>4.216</b> | <b>0.216</b> |                       |
| <b>2a</b> | V1             | 4        | 4.247        | 0.247        |                       |
|           | V2             | 4        | 4.280        | 0.280        |                       |
|           | <b>average</b> | <b>4</b> | <b>4.264</b> | <b>0.264</b> |                       |
| <b>2b</b> | V3             | 4        | 4.025        | 0.025        |                       |
| <b>3</b>  | V1             | 4        | 4.089        | 0.089        |                       |
|           | V2             | 4        | 4.099        | 0.099        |                       |
|           | V3             | 4        | 4.218        | 0.218        |                       |
|           | <b>average</b> | <b>4</b> | <b>4.135</b> | <b>0.135</b> |                       |
|           | O10            | 2        | 2.172        |              | $\mu_3\text{-O}^{2-}$ |
| <b>4</b>  | V1             | 5        | 5.207        | 0.207        |                       |
|           | V2             | 5        | 5.143        | 0.143        |                       |
|           | V3             | 5        | 5.187        | 0.187        |                       |
|           | <b>average</b> | <b>5</b> | <b>5.179</b> | <b>0.179</b> |                       |
|           | O7             | 1        | 1.394        |              | $\mu_2\text{-OH}^-$   |
|           | O8             | 2        | 1.876        |              | $\mu_3\text{-O}^{2-}$ |
| <b>5</b>  | V1             | 4        | 4.192        | 0.192        |                       |
|           | V2             | 5        | 4.733        | 0.267        |                       |
|           | V3             | 4        | 4.182        | 0.182        |                       |
|           | V4             | 4        | 4.201        | 0.201        |                       |
|           | V5             | 4        | 4.193        | 0.193        |                       |
|           | V6             | 5        | 4.758        | 0.242        |                       |
|           | V7             | 4        | 4.215        | 0.215        |                       |
|           | V8             | 4        | 4.188        | 0.188        |                       |
